# Supplementary material for: The selective hydrogenation of furfural over intermetallic compounds with outstanding catalytic performance
Source: Royal Society of Chemistry journal article supplement (doi:10.1039/c9gc01119f), 2019-01-01
Supplement: c9gc01119f1.pdf [file c9gc01119f1.pdf]

## Electronic Supporting Information

### Selective hydrogenation of furfural on intermetallic compounds with outstanding catalytic performance

Yusen Yang,<sup>‡a</sup> Lifang Chen,<sup>‡a</sup> Yudi Chen,<sup>b</sup> Wei Liu,<sup>a</sup> Haisong Feng,<sup>a</sup> Bin Wang,<sup>c</sup> Xin Zhang,<sup>\*a</sup> Min  
Wei<sup>\*a</sup>

<sup>a</sup> *State Key Laboratory of Chemical Resource Engineering, Beijing Advanced Innovation Center for  
Soft Matter Science and Engineering, Beijing University of Chemical Technology, Beijing 100029, P.  
R. China*

<sup>b</sup> *Beijing Center for Physical & Chemical Analysis, Beijing 100089, P. R. China*

<sup>c</sup> *Beijing Research Institute of Chemical Industry, Sinopec Group, Beijing 100013, P. R. China*

#### Author Information

<sup>‡</sup> These authors contribute equally to this work.

\* Corresponding authors. Tel: +86-10-64412131; Fax: +86-10-64425385.

E-mail addresses: zhangxin@mail.buct.edu.cn (X. Zhang); weimin@mail.buct.edu.cn (M. Wei).

**Table S1** Lattice parameters ( $\text{\AA}$ ) of bulk  $\text{Ni}_3\text{Sn}_2$  from PBE, PW91, PBEsol, and PBE-D3 functionals

| GGA functional | Lattice constant/ $\text{\AA}$ |      |      | Volume deviation |
|----------------|--------------------------------|------|------|------------------|
|                | a                              | b    | c    |                  |
| PBE            | 4.29                           | 4.29 | 5.29 | 0.07%            |
| PW91           | 4.29                           | 4.29 | 5.30 | 0.10%            |
| PBEsol         | 4.23                           | 4.23 | 5.21 | 0.20%            |
| PBE-D3         | 4.25                           | 4.25 | 5.24 | 0.01%            |
| Expt.[1]       | 4.15                           | 4.15 | 5.25 | -                |

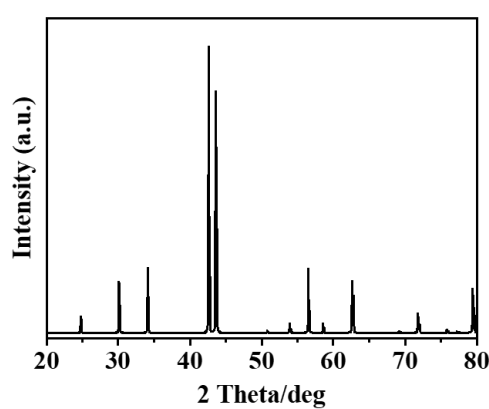

**Fig. S1** Reflex powder diffraction pattern of  $\text{Ni}_3\text{Sn}_2$  crystalloid simulated by computer.

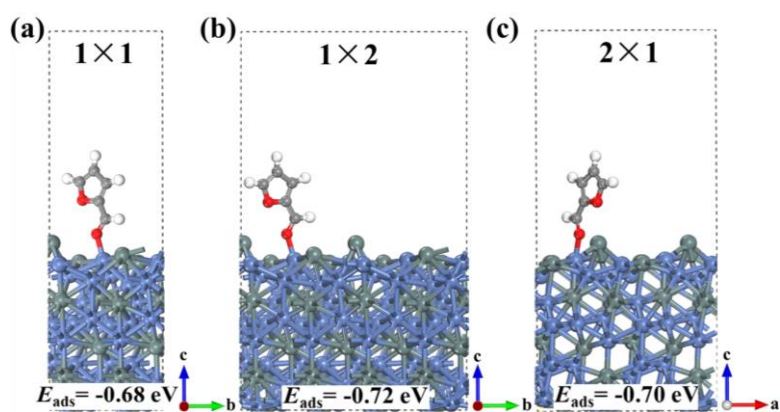

**Fig. S2** Adsorption energies of furfural on the surface of  $\text{Ni}_3\text{Sn}_2(101)$  with various crystal size.

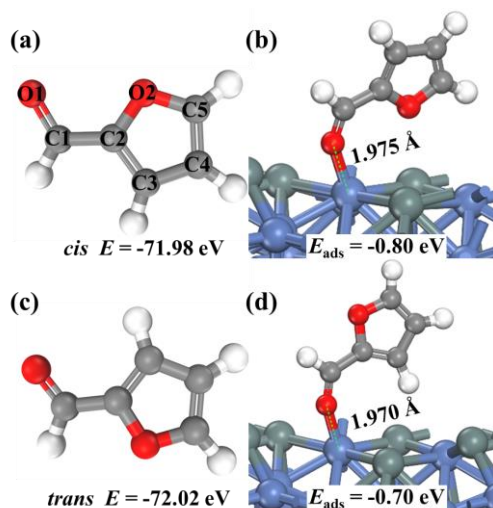

**Fig. S3** Optimized adsorption structures and adsorption energies of *cis*-, *trans*-furfural on  $\text{Ni}_3\text{Sn}_2(101)$ .

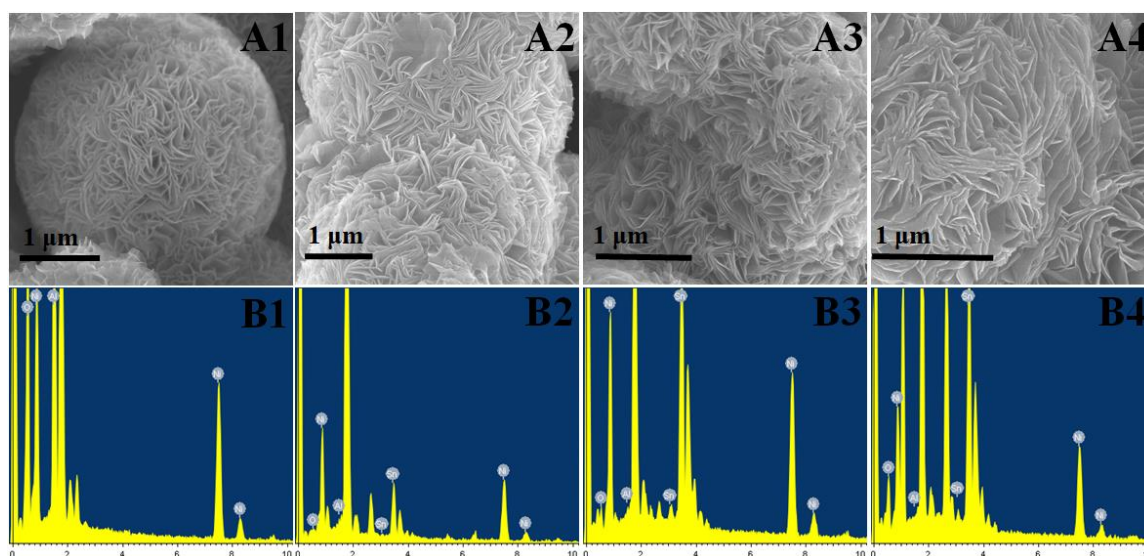

**Fig. S4** SEM images of (A1) the as-synthesized  $\text{Ni}_2\text{Al-LDHs}$  precursor and the  $\text{Sn(OH)}_4/\text{Ni}_2\text{Al-LDHs}$  mixtures with Sn/Ni molar ratio of (A2) 1/3, (A3) 2/3, (A4) 4/3, respectively. EDS analysis of (B1) the as-synthesized  $\text{Ni}_2\text{Al-LDHs}$  precursor and the  $\text{Sn(OH)}_4/\text{Ni}_2\text{Al-LDHs}$  mixtures with total Sn/Ni molar ratio of (B2) 1/3, (B3) 2/3, (B4) 4/3, respectively.

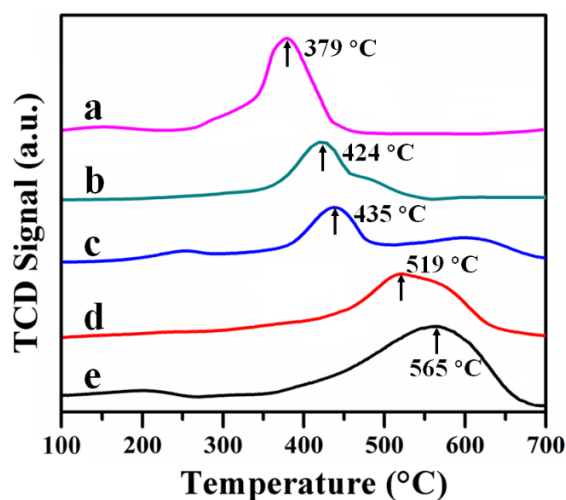

**Fig. S5** H<sub>2</sub>-TPR profiles for (a) the as-synthesized Ni<sub>2</sub>Al-LDHs precursor, the Sn(OH)<sub>4</sub>/Ni<sub>2</sub>Al-LDHs mixtures with total Sn/Ni molar ratio of (b) 1/3, (c) 2/3, (d) 4/3, and (e) Sn(OH)<sub>4</sub>, respectively.

**Table S2** Bader charges analysis of pristine Ni, Ni<sub>3</sub>Sn<sub>1</sub>, Ni<sub>3</sub>Sn<sub>2</sub> and Ni<sub>3</sub>Sn<sub>4</sub>

| Sample                          | Atom             | Charge |
|---------------------------------|------------------|--------|
| Sn                              | Sn               | 0.00   |
| Ni                              | Ni               | 0.00   |
| Ni <sub>3</sub> Sn <sub>1</sub> | Sn <sup>a</sup>  | +0.51  |
|                                 | Ni1 <sup>b</sup> | -0.18  |
|                                 | Ni2 <sup>b</sup> | -0.16  |
| Ni <sub>3</sub> Sn <sub>2</sub> | Ni3 <sup>b</sup> | -0.17  |
|                                 | Sn1 <sup>a</sup> | +0.49  |
|                                 | Sn2 <sup>a</sup> | +0.49  |
|                                 | Ni1 <sup>b</sup> | -0.09  |
| Ni <sub>3</sub> Sn <sub>4</sub> | Ni2 <sup>b</sup> | -0.09  |
|                                 | Ni3 <sup>b</sup> | -0.80  |
|                                 | Sn1 <sup>a</sup> | +0.26  |
|                                 | Sn2 <sup>a</sup> | +0.30  |
|                                 | Sn3 <sup>a</sup> | +0.33  |
|                                 | Sn4 <sup>a</sup> | +0.34  |
|                                 | Ni1 <sup>b</sup> | -0.44  |
| Ni2 <sup>b</sup>                | -0.40            |        |
| Ni3 <sup>b</sup>                | -0.39            |        |

<sup>a</sup> Different Sn atoms in Ni-Sn IMCs.

<sup>b</sup> Different Ni atoms in Ni-Sn IMCs.

**Table S3** Curve-fitting and DFT calculation results of Ni K-edge EXAFS spectra of pristine Ni, Ni<sub>3</sub>Sn<sub>1</sub>, Ni<sub>3</sub>Sn<sub>2</sub> and Ni<sub>3</sub>Sn<sub>4</sub>

| Sample                          | Shell | $R(\text{\AA})$  | $R(\text{\AA})$   | CN               | CN                | $\Delta\sigma^2(\text{\AA})^e$ |
|---------------------------------|-------|------------------|-------------------|------------------|-------------------|--------------------------------|
|                                 |       | -CF <sup>a</sup> | -DFT <sup>b</sup> | -CF <sup>c</sup> | -DFT <sup>d</sup> |                                |
| Ni                              | Ni-Ni | 2.482            | 2.457             | 11               | 11                | 0.0061                         |
| Ni <sub>3</sub> Sn <sub>1</sub> | Ni-Ni | 2.585            | 2.565             | 5                | 5                 | 0.0149                         |
|                                 | Ni-Sn | 2.630            | 2.617             | 2                | 2                 | 0.0056                         |
| Ni <sub>3</sub> Sn <sub>2</sub> | Ni-Ni | 2.622            | 2.645             | 3                | 3                 | 0.0124                         |
|                                 | Ni-Sn | 2.506            | 2.568             | 5                | 5                 | 0.0173                         |
| Ni <sub>3</sub> Sn <sub>4</sub> | Ni-Ni | 2.661            | 2.703             | 1                | 1                 | 0.0060                         |
|                                 | Ni-Sn | 2.613            | 2.632             | 7                | 7                 | 0.0080                         |

<sup>a</sup> Distance between absorber and backscatter atom, determined by curve fitting.

<sup>b</sup> Distance between absorber and backscatter atom, determined by DFT calculation.

<sup>c</sup> Coordination number, determined by curve fitting.

<sup>d</sup> Coordination number, determined by DFT calculation.

<sup>e</sup> Change in the Debye-Waller factor value relative to the reference sample.

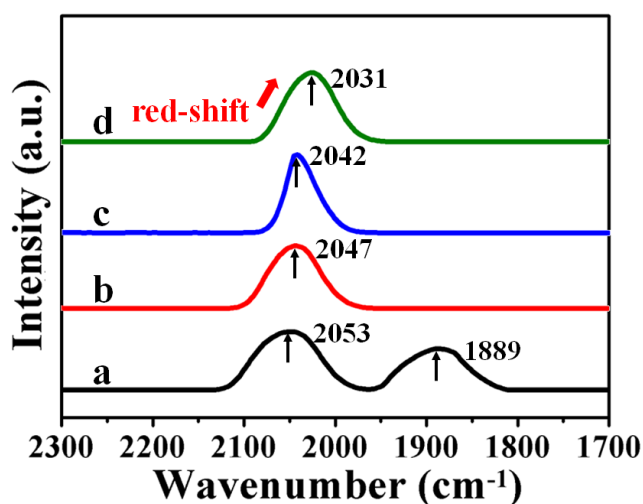

**Fig. S6** *In situ* Fourier-transformed infrared spectra of CO adsorption over (a) Ni, (b) Ni<sub>3</sub>Sn<sub>1</sub>, (c) Ni<sub>3</sub>Sn<sub>2</sub>, and (d) Ni<sub>3</sub>Sn<sub>4</sub>, respectively.

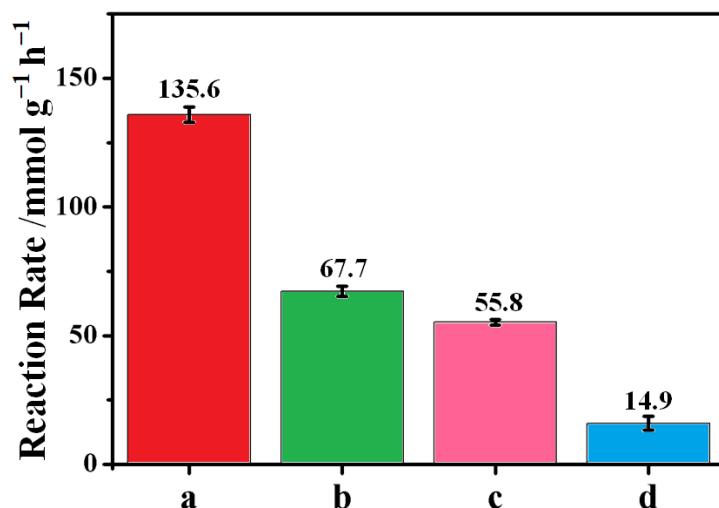

**Fig. S7** Reaction rate for furfural hydrogenation over (a) Ni, (b) Ni<sub>3</sub>Sn<sub>1</sub>, (c) Ni<sub>3</sub>Sn<sub>2</sub>, and (d) Ni<sub>3</sub>Sn<sub>4</sub>, respectively. Reaction rate is calculated on the basis of tangent slope of the conversion-reaction time plot within 20–40% conversion of furfural.

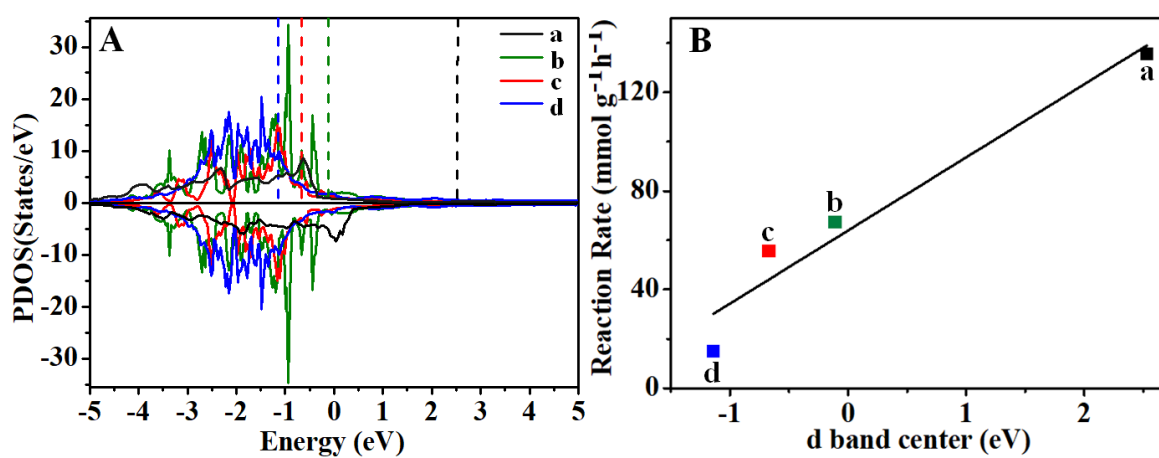

**Fig. S8** (A) Projected density of states of Ni-3d state in: (a) Ni, (b) Ni<sub>3</sub>Sn<sub>1</sub>, (c) Ni<sub>3</sub>Sn<sub>2</sub>, (d) Ni<sub>3</sub>Sn<sub>4</sub>. Corresponding dash lines represent the *d* band center for the bulk Ni (2.53 eV), Ni<sub>3</sub>Sn<sub>1</sub> (−0.11 eV), Ni<sub>3</sub>Sn<sub>2</sub> (−0.67 eV) and Ni<sub>3</sub>Sn<sub>4</sub> (−1.14 eV). (B) Reaction rate vs. *d* band center of (a) Ni, (b) Ni<sub>3</sub>Sn<sub>1</sub>, (c) Ni<sub>3</sub>Sn<sub>2</sub>, (d) Ni<sub>3</sub>Sn<sub>4</sub>.

**Table S4** Comparison of catalytic performance for selective hydrogenation of furfural to furfuryl alcohol over various catalysts

| <b>Entry</b> | <b>Catalyst</b>                                                 | <b>Time<br/>(h)</b> | <b>Conversion<br/>(%)</b> | <b>Selectivity<br/>(%)</b> | <b>Reaction Rate<br/>(mmol g<sup>-1</sup> h<sup>-1</sup>)</b> | <b>Ref.</b> |
|--------------|-----------------------------------------------------------------|---------------------|---------------------------|----------------------------|---------------------------------------------------------------|-------------|
| 1            | Ni/Al <sub>2</sub> O <sub>3</sub>                               | 3                   | 100                       | 2                          | 135.6                                                         | This work   |
| 2            | Ni <sub>3</sub> Sn <sub>1</sub> /Al <sub>2</sub> O <sub>3</sub> | 3                   | 100                       | 75                         | 67.7                                                          | This work   |
| 3            | Ni <sub>3</sub> Sn <sub>2</sub> /Al <sub>2</sub> O <sub>3</sub> | 3                   | 100                       | 99                         | 55.8                                                          | This work   |
| 4            | Ni <sub>3</sub> Sn <sub>4</sub> /Al <sub>2</sub> O <sub>3</sub> | 3                   | 38                        | 99                         | 14.9                                                          | This work   |
| 5            | Ni/C                                                            | 3                   | 67                        | 60                         | 52.6                                                          | [2]         |
| 6            | Ni/SiO <sub>2</sub>                                             | 3                   | 99                        | 50                         | 46.9                                                          | [2]         |
| 7            | Ni-Cu/TiO <sub>2</sub>                                          | 2                   | 91                        | 35                         | 62.8                                                          | [3]         |
| 8            | Ni-Cu/Al <sub>2</sub> O <sub>3</sub>                            | 2                   | 99                        | 3                          | 65.2                                                          | [3]         |
| 9            | Ni-Fe(2)HT-673                                                  | 3                   | 99                        | 96                         | 43.1                                                          | [4]         |
| 10           | Ni-Co(1)HT-673                                                  | 3                   | 85                        | 89                         | 38.5                                                          | [4]         |
| 11           | 20NiCoB/SiO <sub>2</sub>                                        | 2                   | 54                        | 83                         | 26.3                                                          | [5]         |
| 12           | 20NiCoB/ Al <sub>2</sub> O <sub>3</sub>                         | 2                   | 52                        | 91                         | 24.1                                                          | [5]         |
| 13           | Pt@mSiO <sub>2</sub>                                            | 5                   | 25                        | 34                         | 11.4                                                          | [6]         |
| 14           | PtSn@mSiO <sub>2</sub>                                          | 5                   | 99                        | 97                         | 49.8                                                          | [6]         |
| 15           | Pt/Al <sub>2</sub> O <sub>3</sub>                               | 7                   | 80                        | 99                         | 30.1                                                          | [7]         |
| 16           | Pt/MgO                                                          | 7                   | 79                        | 97                         | 29.7                                                          | [7]         |
| 17           | Pt/CeO <sub>2</sub> NH <sub>2</sub>                             | 7                   | 77                        | 98                         | 28.4                                                          | [7]         |
| 18           | Pt-CeO <sub>2</sub> @UIO                                        | 1                   | 100                       | 98                         | 78.3                                                          | [8]         |
| 19           | Pt-CeO <sub>2</sub>                                             | 1                   | 99                        | 1                          | 77.4                                                          | [8]         |

**Table S5** Catalytic performance of Ni<sub>3</sub>Sn<sub>2</sub> after storage in air for one week

| Entry | Catalyst                                                        | Exposure   | Exposure | Conversion (%) | Selectivity (%) |
|-------|-----------------------------------------------------------------|------------|----------|----------------|-----------------|
|       |                                                                 | Atmosphere | Time     |                |                 |
| 1     | Ni <sub>3</sub> Sn <sub>2</sub> /Al <sub>2</sub> O <sub>3</sub> | --         | --       | 100            | 99              |
| 2     | Ni <sub>3</sub> Sn <sub>2</sub> /Al <sub>2</sub> O <sub>3</sub> | Air        | 1 day    | 100            | 98              |
| 3     | Ni <sub>3</sub> Sn <sub>2</sub> /Al <sub>2</sub> O <sub>3</sub> | Air        | 3 days   | 97             | 97              |
| 4     | Ni <sub>3</sub> Sn <sub>2</sub> /Al <sub>2</sub> O <sub>3</sub> | Air        | 5 days   | 95             | 96              |
| 5     | Ni <sub>3</sub> Sn <sub>2</sub> /Al <sub>2</sub> O <sub>3</sub> | Air        | 7 days   | 95             | 96              |

Reaction conditions: furfural/Ni = 58 (molar ratio); furfural, 1.0 mL; iso-PrOH, 30 mL; temperature, 100 °C; H<sub>2</sub> pressure, 2 MPa; reaction time, 4 h.

**Table S6** Catalytic performance for hydrogenation of different kinds of unsaturated aldehydes over Ni and Ni<sub>3</sub>Sn<sub>2</sub> IMC

| Entry | Substrate                                                                           | Product                                                                             | Ni   |      | Ni <sub>3</sub> Sn <sub>2</sub> |      |
|-------|-------------------------------------------------------------------------------------|-------------------------------------------------------------------------------------|------|------|---------------------------------|------|
|       |                                                                                     |                                                                                     | Con. | Sel. | Con.                            | Sel. |
| 1     | 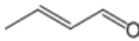 |  | 91%  | 0    | 45%                             | 54%  |
| 2     |  |  | 100% | 1%   | 42%                             | 71%  |
| 3     |  |  | 97%  | 0    | 64%                             | 62%  |
| 4     |  |  | 76%  | 2%   | 23%                             | 69%  |
| 5     |  |  | 80%  | 1%   | 36%                             | 57%  |
| 6     |  |  | 92%  | 1%   | 49%                             | 32%  |

Reaction conditions: furfural/Ni = 58 (molar ratio); furfural, 1.0 mL; iso-PrOH, 30 mL; temperature, 100 °C; H<sub>2</sub> pressure, 2 MPa, reaction time, 6 h.



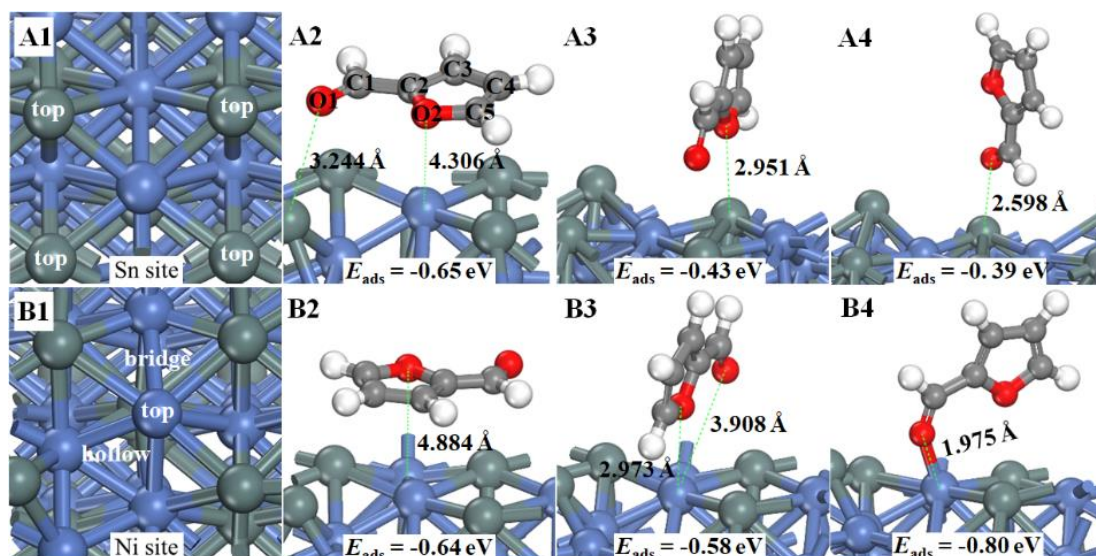

**Fig. S9** Optimized adsorption structures and adsorption energies of furfural at Sn site (A1–A4) and Ni site (B1–B4) on the surface of  $\text{Ni}_3\text{Sn}_2(101)$ .

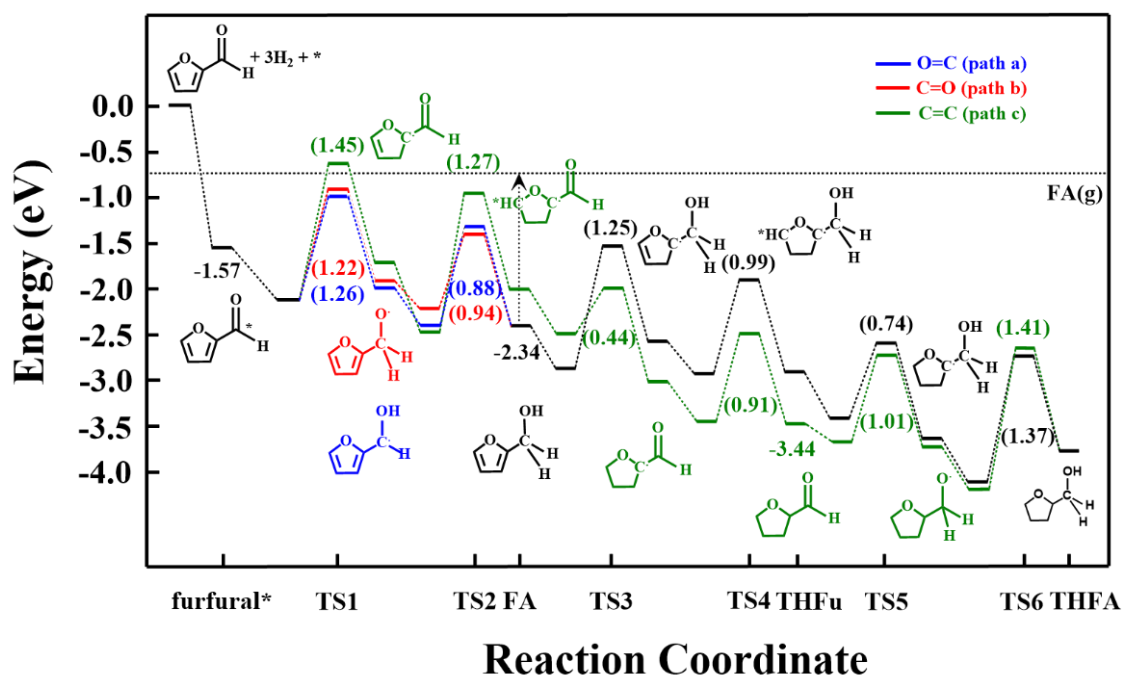

**Fig. S10** Potential energy profiles for hydrogenation of furfural to tetrahydrofurfuryl alcohol on Ni(111) surface. Red line, H atom attacks O1. Blue lines, H atom attacks C1. Green line, H atom attacks C3 in furfural. The black arrow represents desorption of furfuryl alcohol. Numbers in the parentheses represent reaction barriers of elementary step, and others stands for adsorption energies.

**Table S7** Free energies at various reaction temperatures involved in the reaction process (R1–R5)

| Free energies/eV         | R1    | R2    | R3   | R4   | R5   |
|--------------------------|-------|-------|------|------|------|
| $\Delta G(353\text{ K})$ | -0.60 | -0.47 | 0.23 | 0.82 | 0.52 |
| $\Delta G(363\text{ K})$ | -0.60 | -0.47 | 0.23 | 0.83 | 0.51 |
| $\Delta G(373\text{ K})$ | -0.59 | -0.46 | 0.24 | 0.84 | 0.50 |
| $\Delta G(383\text{ K})$ | -0.59 | -0.45 | 0.24 | 0.85 | 0.40 |
| $\Delta G(393\text{ K})$ | -0.58 | -0.44 | 0.24 | 0.87 | 0.49 |

**Table S8** Equilibrium constant for step R1–R3 and reaction rate constant for Step R3 and R4 at various reaction temperatures

| $T/K$ | $K_1 (\text{mol/L})^{-1}$ | $K_2 (\text{mol/L})^{-1}$ | $K_3$                | $k_3 (\text{mol/L})\cdot\text{s}^{-1}$ | $k_4 (\text{mol/L})\cdot\text{s}^{-1}$ |
|-------|---------------------------|---------------------------|----------------------|----------------------------------------|----------------------------------------|
| 353   | $4.22\times 10^8$         | $5.64\times 10^6$         | $4.76\times 10^{-4}$ | $7.71\times 10^{-10}$                  | 186.47                                 |
| 363   | $2.05\times 10^8$         | $2.91\times 10^6$         | $5.52\times 10^{-4}$ | $3.09\times 10^{-9}$                   | 331.07                                 |
| 373   | $1.03\times 10^8$         | $1.56\times 10^6$         | $6.35\times 10^{-4}$ | $1.15\times 10^{-8}$                   | 569.91                                 |
| 383   | $5.38\times 10^7$         | $8.61\times 10^5$         | $7.25\times 10^{-4}$ | $3.99\times 10^{-8}$                   | 683.31                                 |
| 393   | $2.91\times 10^7$         | $4.91\times 10^5$         | $8.21\times 10^{-4}$ | $1.30\times 10^{-7}$                   | 765.06                                 |

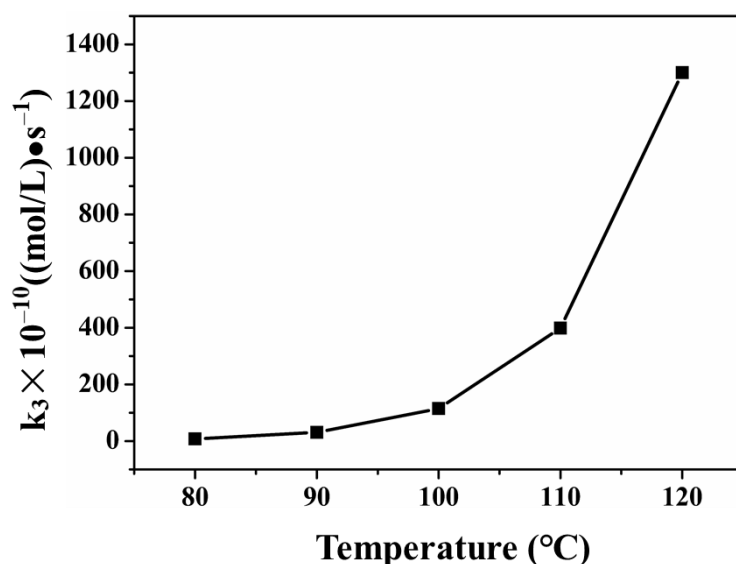

Fig. S11 Rate constant  $k_3$  as a function of reaction temperature.

## References

- [1] H. Fjellvåg, A. Kjekshus, *Acta Chem. Scand., A* 1986, **40**, 23–30.
- [2] H. Jeong, C. Kim, S. Yang, H. Lee, *J. Catal.*, 2016, **344**, 609–615.
- [3] B. Seemala, C. M. Cai, C. E. Wyman, P. Christopher, *ACS Catal.*, 2017, **7**, 4070–4082.
- [4] W. S. Putro, T. Kojima, T. Hara, N. Ichikuni, S. Shimazu, *Catal. Sci. Technol.* 2017, **7**, 3637–3646.
- [5] H. Guo, H. Zhang, L. Zhang, C. Wang, F. Peng, Q. Huang, L. Xiong, C. Huang, X. Ouyang, X. Chen, X. Qiu, *Ind. Eng. Chem. Res.*, 2018, **57**, 498–511.
- [6] R. V. Maligal-Ganesh, C. Xiao, T. W. Goh, L. Wang, J. Gustafson, Y. Pei, Z. Qi, D. D. Johnson, S. Zhang, F. Tao, W. Huang, *ACS Catal.*, 2016, **6**, 1754–1763.
- [7] M. J. Taylor, L. J. Durndell, M. A. Isaacs, C. M. A. Parlett, K. Wilson, A. F. Lee, G. Kyriakou, *Appl. Catal., B Environ.*, 2016, **180**, 580–585.
- [8] Y. Long, S. Song, J. Li, L. Wu, Q. Wang, Y. Liu, R. Jin, H. Zhang, *ACS Catal.*, 2018, **8**, 8506–8512.
